# Supplementary material for: Nanoparticles With a Specific Size and Surface Charge Promote Disruption of the Secondary Structure and Amyloid-Like Fibrillation of Human Insulin Under Physiological Conditions
Source: PubMed Central journal article supplement (PMC6683663; doi:10.3389/fchem.2019.00480), 2019-07-30
Supplement: Data_Sheet_1.pdf [file Data_Sheet_1.pdf]

## SUPPLEMENTARY MATERIALS

### **Nanoparticles with a specific size and surface charge promote disruption of the secondary structure and amyloid-like fibrillation of human insulin under physiological conditions**

1 **Alyona Sukhanova<sup>1,2,\*</sup>, Simon Poly<sup>3</sup>, Svetlana Bozrova<sup>2</sup>, Éléonore Lambert<sup>1</sup>, Maxime Ewald<sup>1</sup>,**  
2 **Alexander Karaulov<sup>4</sup>, Michael Molinari<sup>1</sup>, Igor Nabiev<sup>1,2,\*</sup>**

3 <sup>1</sup> Laboratoire de Recherche en Nanosciences, LRN-EA4682, UFR de Pharmacie, Université de  
4 Reims Champagne-Ardenne, 51 rue Cognacq Jay, 51100 Reims, France

5 <sup>2</sup> Laboratory of Nano-Bioengineering, National Research Nuclear University MEPhI (Moscow  
6 Engineering Physics Institute), 31 Kashirskoe shosse, 115409 Moscow, Russian Federation

7 <sup>3</sup> Department of Membrane Biophysics, University of Tübingen Interfaculty Institute of  
8 Biochemistry, Hoppe-Seyler-Straße 4, 72076 Tübingen Bad-Württemberg, Germany

9 <sup>4</sup> Department of Clinical Immunology and Allergology, Sechenov First Moscow State Medical  
10 University, 119992 Moscow, Russian Federation

#### 11 **\* Correspondence:**

12 Igor Nabiev or Alyona Sukhanova  
13 [igor.nabiev@univ-reims.fr](mailto:igor.nabiev@univ-reims.fr); [alyona.sukhanova@univ-reims.fr](mailto:alyona.sukhanova@univ-reims.fr)

14 **Keywords: nanomaterials, protein adsorption, quantum dots, proteinopathies, insulin,**  
15 **fibrillation, amyloidosis, Alzheimer's disease, Parkinson's disease.**

16

#### 17 **Supplementary Figures:**

18 **Supp-Fig. 1:** Changes in the human insulin secondary structure in the presence of CdSe/ZnS QDs  
19 with different surface modification and the same hydrodynamic diameters (12 nm, Table 1).

20 **Supp-Fig. 2:** Changes in the human insulin secondary structure in the presence of PEG-OH-modified  
21 CdSe/ZnS QDs of different diameters (Table 1).

22 **Supp-Fig. 3:** Changes in the human insulin secondary structure in the presence of different  
23 concentrations of PEG-OH-modified CdSe/ZnS QDs of 12-nm hydrodynamic diameter (Table 1).

24

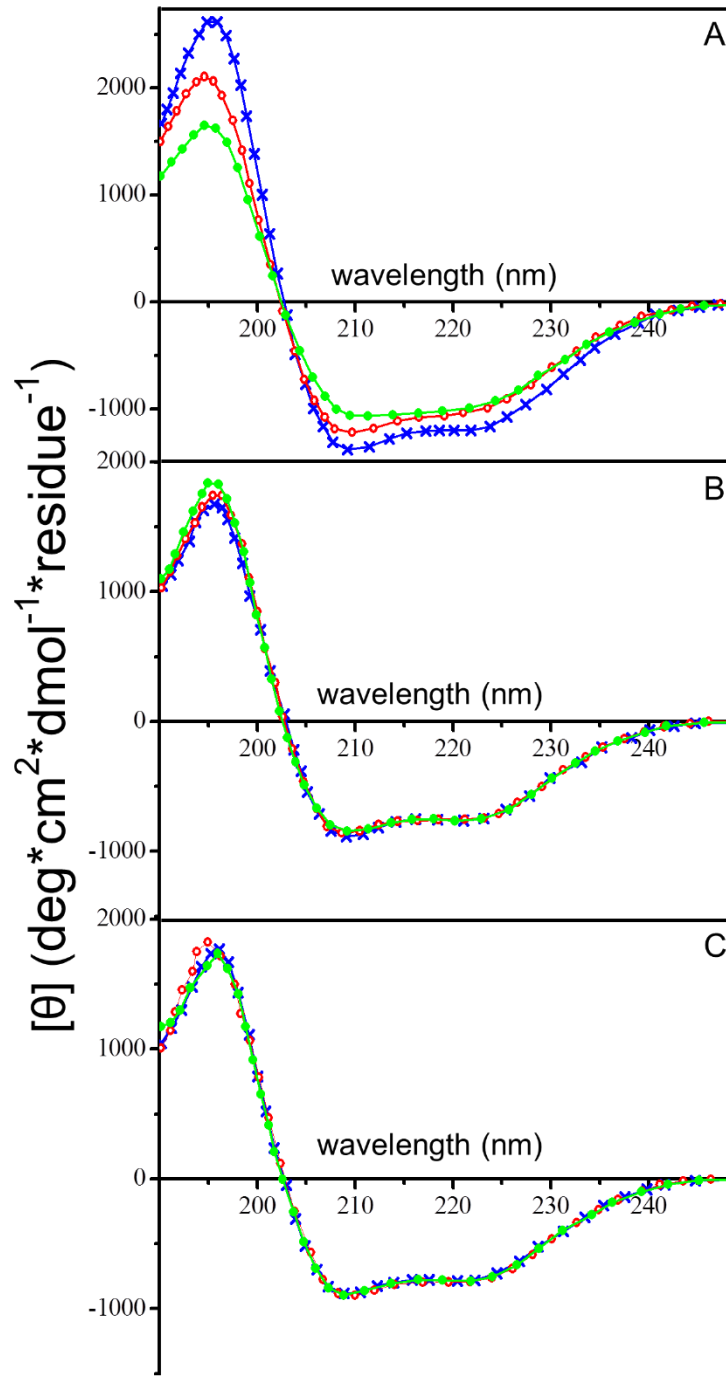

25  
 26 **Supp-Fig. 1.** Changes in the human insulin secondary structure in the presence of CdSe/ZnS QDs  
 27 with different surface modification and the same hydrodynamic diameters (12 nm, Table 1).

28 The circular dichroism spectra of human insulin (2 mg/ml) were recorded in the presence of 3.44  $\mu\text{M}$   
 29 of CdSe/ZnS QDs modified with PEG-OH (A), PEG-COOH (B), and PEG-OH/PEG-NH<sub>2</sub> (C). The  
 30 reaction mixtures were incubated for 24 h in a 10 mM sodium phosphate buffer solution (pH 7) at  
 31 37°C, and CD spectra were recorded after 0 (blue), 12 (red), and 24 h (green) of incubation.

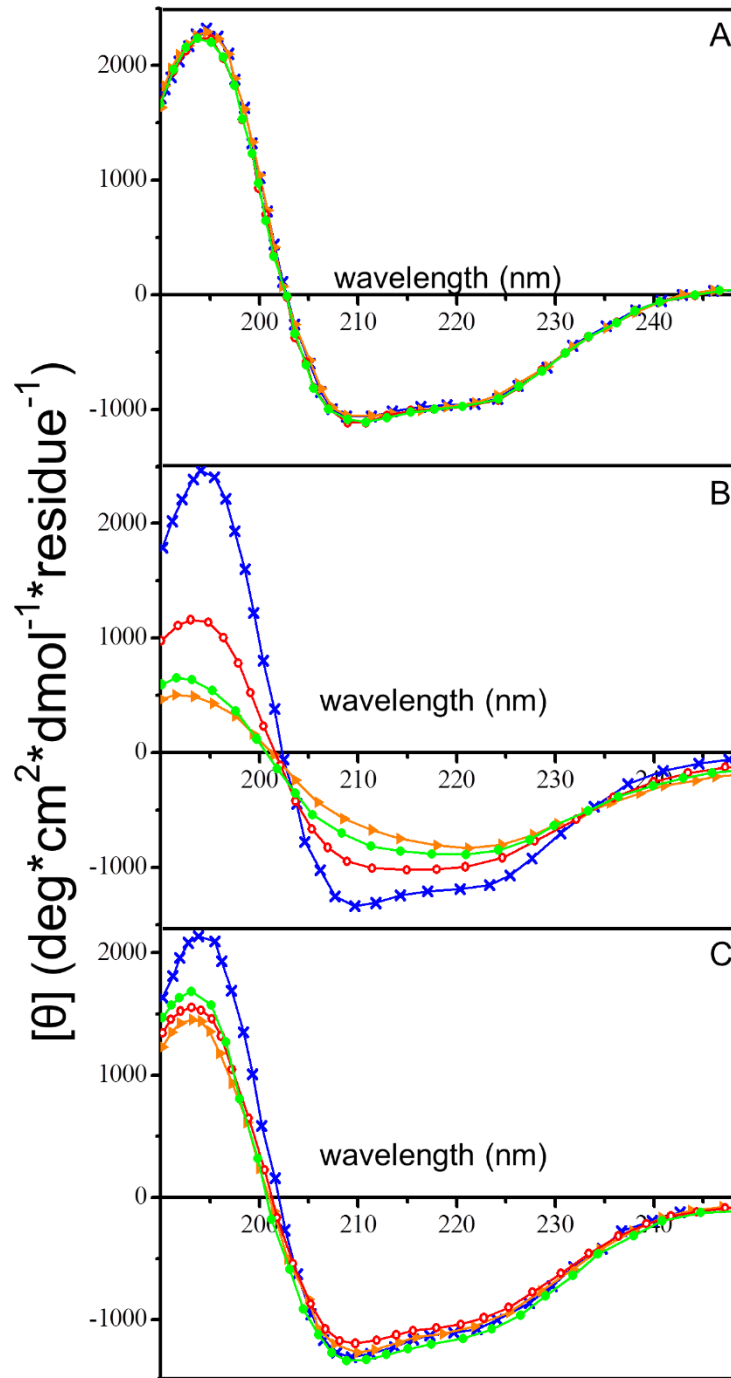

32  
 33 **Supp-Fig. 2.** Changes in the human insulin secondary structure in the presence of PEG-OH-modified  
 34 CdSe/ZnS QDs of different diameters (Table 1).

35 The circular dichroism spectra of human insulin (2 mg/ml) were recorded in the presence of 3.44  $\mu$ M  
 36 of QDs with hydrodynamic diameters of 9 nm (A), 12 nm (B), or 15 nm (C) nm (Table 1).

37 All solutions were incubated for 3 days in a 10 mM sodium phosphate buffer solution (pH 7) at 37°C,  
 38 and CD spectra were recorded after 0 (blue), 1 (red), 2 (green), and 3 (orange) days of incubation.

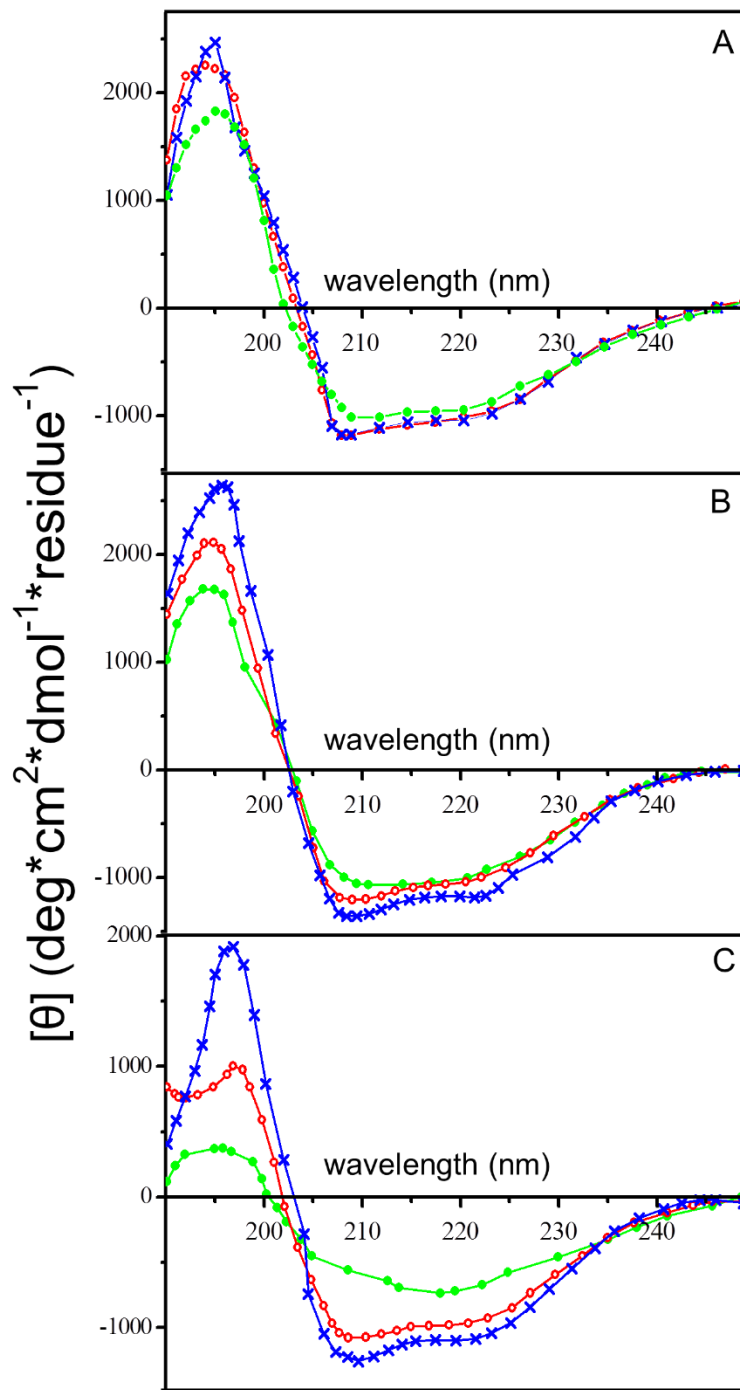

39  
 40 **Supp-Fig. 3.** Changes in the human insulin secondary structure in the presence of different  
 41 concentrations of PEG-OH-modified CdSe/ZnS QDs of 12-nm hydrodynamic diameter (Table 1).

42 The circular dichroism spectra of human insulin (2 mg/ml) were recorded in the presence of different  
 43 concentrations of QDs: 0.86  $\mu\text{M}$  (A), 3.44  $\mu\text{M}$  (B), and 13.76  $\mu\text{M}$  (C). All solutions were incubated  
 44 in a 10 mM sodium phosphate buffer (pH 7) at 37°C for 24 h, and CD spectra were recorded after 0  
 45 (blue), 12 (red), and 24 h (green) of incubation.
